# Supplementary material
Source: PubMed Central journal article supplement (PMC2995702)
Supplement: NIHMS144183-supplement-1.pdf [file NIHMS144183-supplement-1.pdf]

# Figure S1: Genomic location and promoter sequence of the ZSWIM4 gene

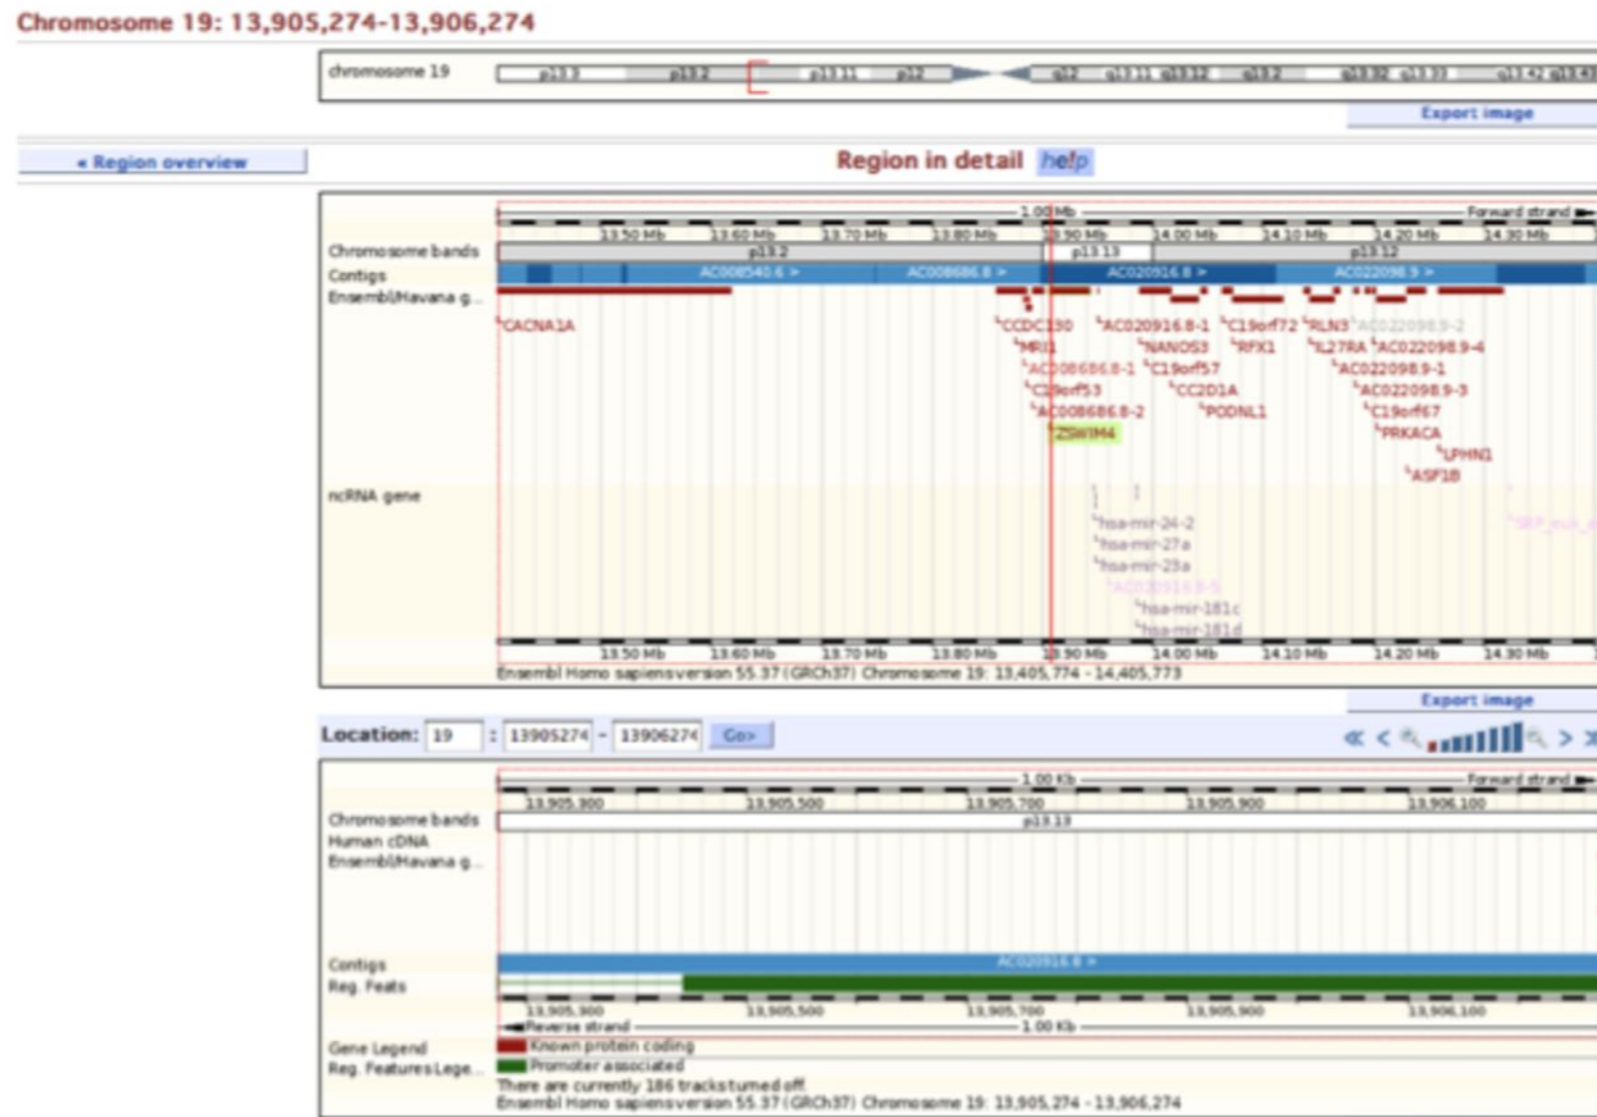

```
>19 dna:chromosome chromosome:GRCh37:19:13905274:13906274:1
```

```

AAAAAAAAACCGCCGAAACAGATAAATAAATGGTAATGGTGAGAAGTATGAGGAAGGAAAAATGCAGGGTCCTCTGAGGACATTGGCAAGGAGCCGGGACGG
GAACGGGTGATGGAAGCCATGGCCAGCTTCCAGGCCAGAGACGGTGGCCTACACAAGCTGAGTCAGAAAAAATGCTCAGAGGTGCTGGGGTTTGATTAAGT
GTTAGGGTGAACCTCATGGAATTGCCATTTTAAACAGGCCAAAAATGGTAAAAAAAATTAGCAATTTTCATATGACCCAAGATAGTATCTAGGGCATGGAAA
GGAGGGGCGGGGTACTATACTAGTTTTTGAGGCTCAAGGGATGACCTATGAACCCCTAACCGAGCTTTGTTTTCTGGAGAGGGGGTCCGCGGCCCGCATGAG
CTCCCTCAGTGAGCCTGCGACCCCTCCGCCCCACAAGAACCAAAACCTTGACCCGGTGCCAGAGAGGTTGAGTGAGTTTCTCGGGTCGCACAGCTGGGAG
GGACGAGGGGCTGAGCCACTGCCAAGGGATCCCGCTGCTCTGTCTCGCTCACCGGCCGGGCTATGTTGATTGTCCCCTCGCGGCCCGGAAGCGACCCTC
AGTAAACAAAGCCGTGTGTGGGCGCAGCCCCAGAAGCCTGGGGCGCGCAGTCCAGCCCAAGAGAGGCGGGGGAGGAATGTTGTGAATGAACCCCGGGCCCG
CCCCGAACTCCGCATAAGGCCTGGGCCGCGGGGGTCTCCACTCTGATTGGCCTCTGGCGCCCCGTGATTGACAGCGCCCCTCGCTGTGCGCTCTGGTT
GGGTAAACAAGAAAAGACTGGCATCGCAGTCATCGAGTGAGCAGCGAGGCTTGGACACGGGTCTGGCGGCGCAGCCAATGGCGGGGGAGGGCCGAGGAGGC
CGAGGGGGGGCCAATAGGGACAGGCGGTGGGGGCGGGACGACGGCGGAGCTAAAGCGGCGGCTGAAGCAGCTTCATTGTTGTGAAGAGTCTT

```
