# Supplementary material
Source: PubMed Central journal article supplement (PMC2995702)
Supplement: NIHMS144183-supplement-2.pdf [file NIHMS144183-supplement-2.pdf]

## Figure S2: Genomic location and promoter sequence of the MGC11271 gene

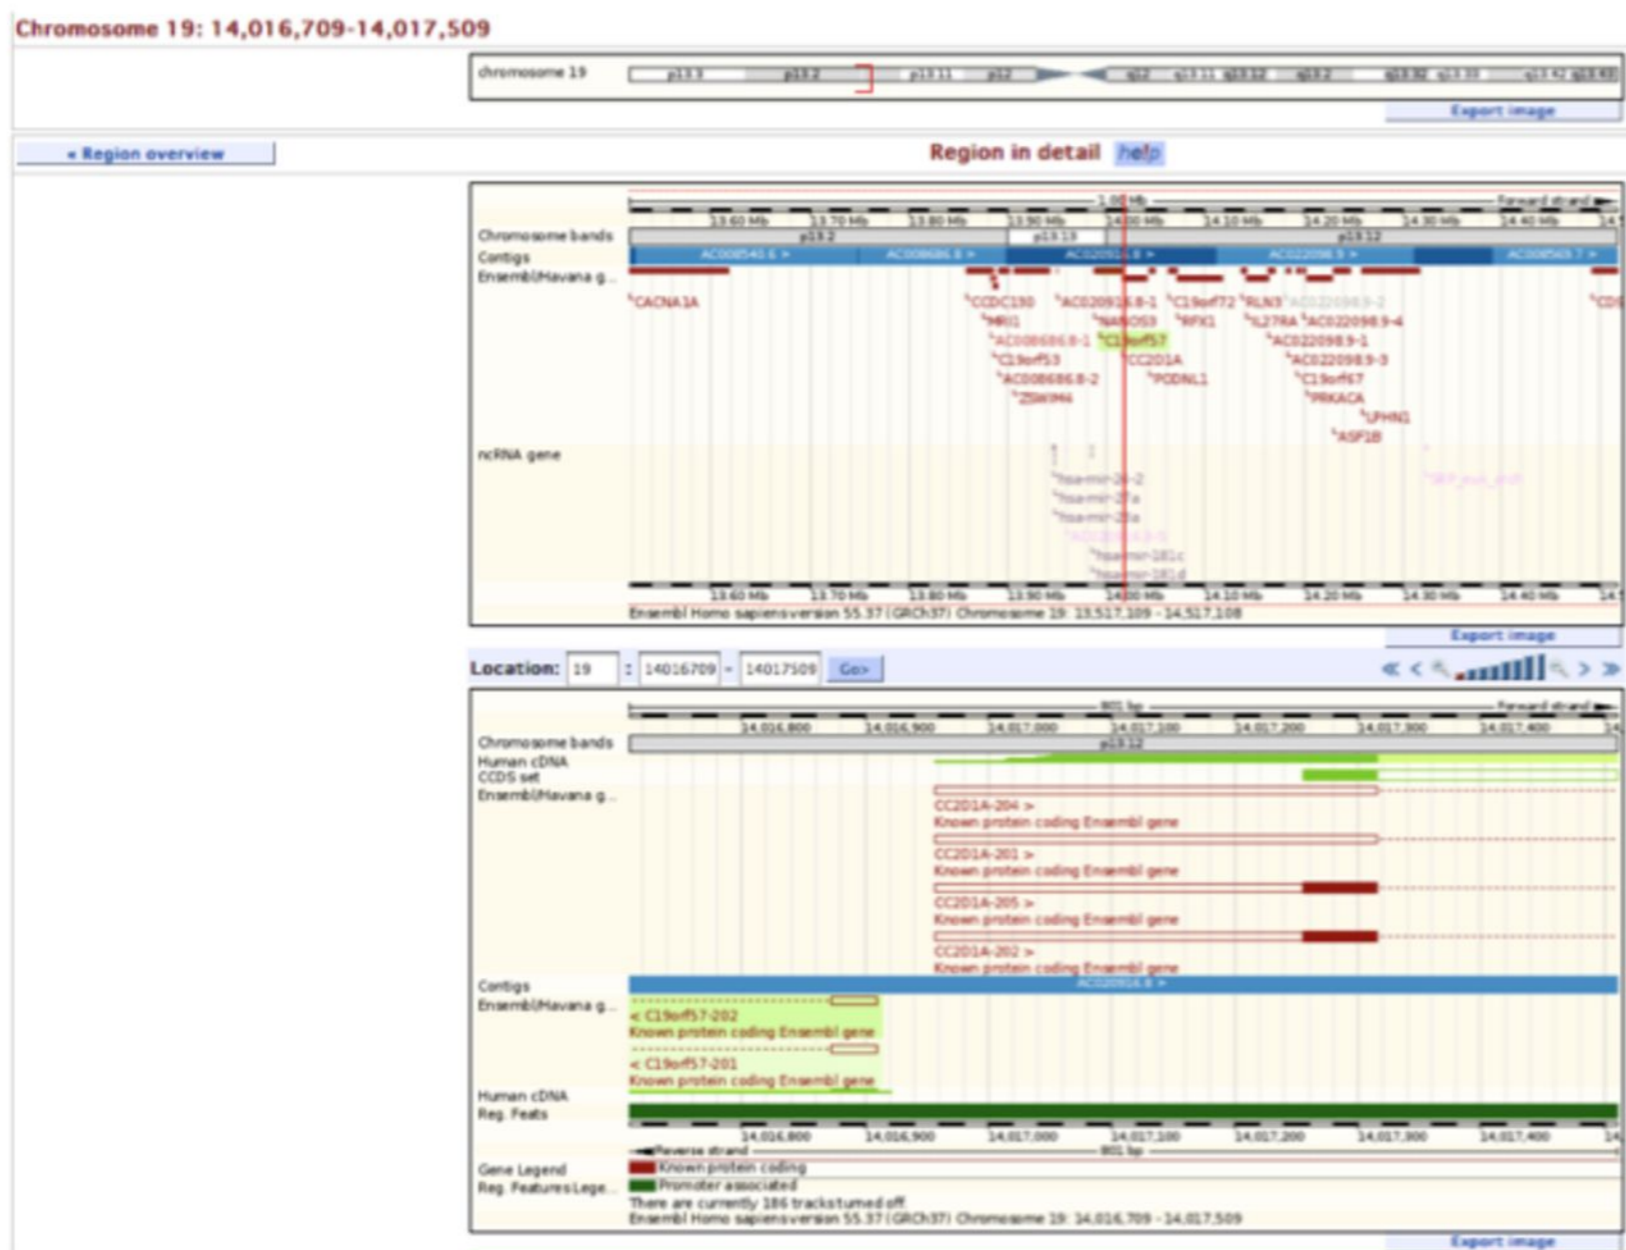

>19 dna:chromosome chromosome:GRCh37:19:14016709:14017509:1

```

AGGGTGGGCGCTGTAGACCCCGCTCCCGGTGACAAGCCCCACACTGACACTACGCCGACCACCGAGAAGTGAGGACTCCACAGGCCGAGAGCCCACGTGAAG
CCGGAGCCCGTCCGGTACTGACAGACGCTCTGAACCCACAGATGTCGCCGCCCTCACACCTGCGCGCGCTCTGCCTCTTTCCCGCGCCCCGCGAGGTCCC
GCCCCGCGCATGAGCGACGCAAACACCGCCCTCGCAGCCCGCGACAGTCAGCACCGCCCCAGCCAGGCGCCTGCGCGCCCACGCACTACCTGCCGGGAGTTG
TAGTTTCGGCTCGGCAGACCCGGCGAGCCAGTGGCCGCGCTCCGGTGCGGCGGCCGAGGCCGAGGCCGGAAGTGGGACGGCCAAGCAGGGAAGCGAGG
GCTCGGGATCGACGGCCGCGGGGCGCCGACGAGGAGTGCAGGACTCAGGAAGGGCGAGTGCGCGGCGACAGAGCCCGGGGAAGGAGGCAGGGCAAGGCCGGG
CTTGGGGGCAGGTGGTCCGGGCATCCAGCCTTGAAGATGCACAAGAGGAAAGGACCCCCGGGACCCCCGGGCAGAGGCGCCGCGGCCGCCCGCCAGGTGAGT
TTGCGCCCCACGGCCCGACCTGGGGATCCCTCCCCACCCCGTCACTCGCTCAGGGAAGGGCCCCACCCCCAGGGAAGCCCGATCTCCGCCCCACAGGTAA
GCCCCGGTCCCCGCTCCCCCAGGTGAGGCTCCAACACCACCAAGTGTGGCCTACTGGCCTTGGCTCCCAGCTCCTGGGGCCCT

```
