# Supplementary material
Source: PubMed Central journal article supplement (PMC2995702)
Supplement: NIHMS144183-supplement-3.pdf [file NIHMS144183-supplement-3.pdf]

Figure S3: Complete 3'UTR of the MKP-7 gene

Human DUSP16 3' UTR

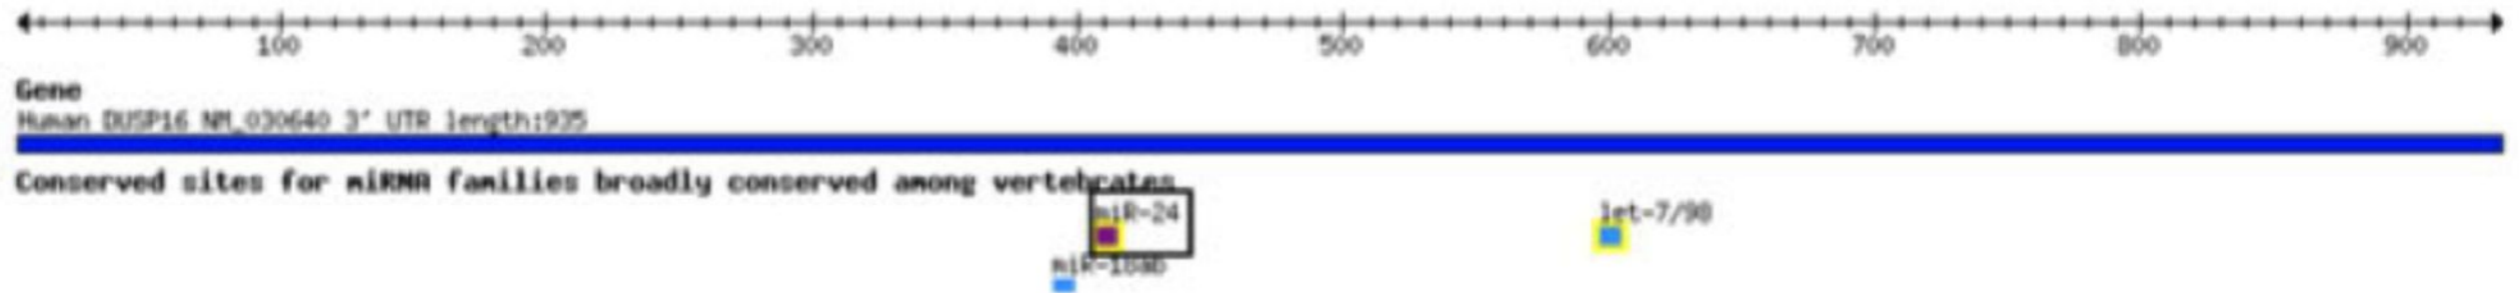

>gi|38372910|ref|NM\_030640.1| Homo sapiens dual specificity phosphatase 16 (DUSP16)

AAGAAAGACACUUGUGACUUCUAUAGACAAUUUUUUUUUCUUGUUCACAAAAAAUUCUCCGUAAAUCUGAAAUAUAUAUAUGUACAUAUAUAUUUUUGGA  
AAAUGGAGCUAUGGUGUAAAAGCAACAGGUGGAUCAACCCAGUUGUUAUCUCUUAACAUCUGCAUUUGAGAGAUCAAGCUAAUACUUCUCUACAACAAAAUGGA  
AGGGCAGAUGCAGAAUCCCCCUAGACGGAGGAAAACCAUUUUUAUUCAGUGAAUUAACAUAUCCUCUUGUUCUUAUUUUUAGCAAGUGUCUUUGGUGUUGGAGGA  
CAAAUCCCCUACCAUUUUCACGUUGUGCUACUAAGAGAUUCUAAAUAUUAGUCUUUGUCCGGACCCUCCAUAUAGUACACCUUAGCGCUGAGA **CUGAGCCA**GCU  
UGGGGGUCAGGUAGGUAGACCCUGUUAGGGACAGAGCCUAGUGGUAAAUCCAAGAGAAAUGAUCUUAUCCAAAGCUGAUUCACAAACCCACGCUCACCUGACAG  
CCGAGGGACACGAGCAUCACUCUGCUGGACGGACCAUUAGGGGCCUUGCCAAGGUCUACCUCUAGAGCAAACCCAGUACCUCAGACAGGAAAGUCGGGGCUUUGA  
CCACUACCAUAUCUGGUAGCCCAUUUUCUAGGCAUUGUGAAUAGGUAGGUAGCUAGUCACACUUUUCAGACCAAUCAAACUGUCUAUGCACAAAAUUCUCCGUG  
GGCCUAGAUGGAGAUAAUUUUUUUUUCUUCUCAGCUUUUAUGAAGAGAAGGGAAACUGUCUAGGAUUCAGCUGAACACCAGGAACCUGGCAACAUCACGAUUUA  
AGCUAAGGUUGGGAGGCUAACGAGUCUACCUCUUCUUGUAAAUCAAGAAUUGUUUAAAUGGGAUUGUCAUCCUUUAAAUAAGAUGAACUUGGUUUC
